# Supplementary material for: Integrative In-Silico Characterization of Methyl Orange and its Degradants Using Physiochemical, Spectral, Docking and ADMET evaluation
Source: Research Square preprint supplement (doi:10.21203/rs.3.rs-8627435/v1), 2026-02-19
Supplement: Supplementary file 1 [file a10d66f3738da431bc7e5dcc.docx]

**Integrative In-Silico Characterization of Methyl Orange and its Degradants Using Physiochemical, Spectral, Docking and ADMET evaluation**

Abu Yousufa, Kaiser Mahmood Fahimb*, Musa Miah Shakilc, Farzana Islamd, Md. Mohibul Islame, Tanzim Talhae

**Supporting Data**

| Content | Page |
| --- | --- |
| Table S1. A table with different characteristics (MF, MW, Structure) of MO and its degradants | SI Page-2 |
| Table S2. Vibration frequencies of MO degradants | SI Page-3 |
| Table S3. Electronic transition table of the MO degradants | SI Page-4 |
| Table S4. The binding affinity and nonbonding interactions of MO degradants with the receptor protein (HSA) | SI Page-5 |
| Table S5. Ligand interactions | SI Page-6 |

**Table S1.** A table with different characteristics (MF, MW, Structure) of MO and its degradants

| Degradants | MF | MW | Structure | Optimized Structure |
| --- | --- | --- | --- | --- |
| MO | C14H15N3O3SNa | 327.337 |  | 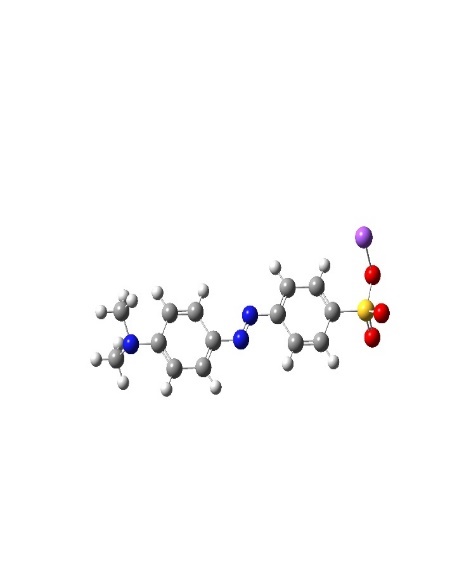 |
| MO1 | C6H7NO3S | 173.190 |  | 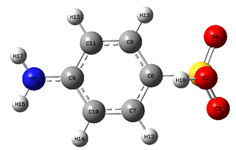 |
| MO2 | C8H11N | 121.179 |  | 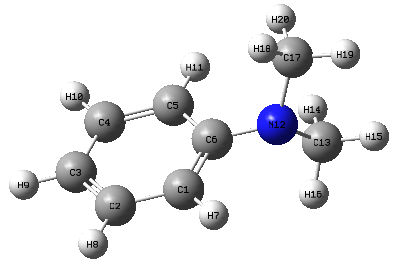 |
| MO3 | C6H5NaO4S | 196.157 |  | 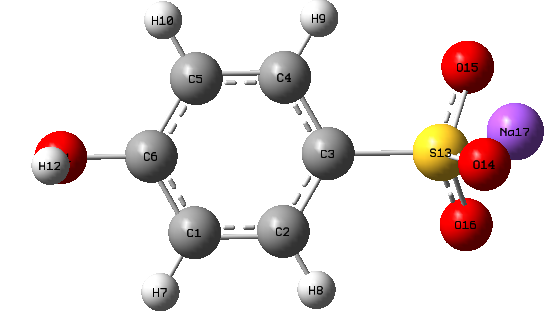 |
| MO4 | C8H12N2 | 136.194 |  | 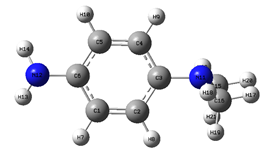 |
| MO5 | C6H6O3S | 158.178 |  | 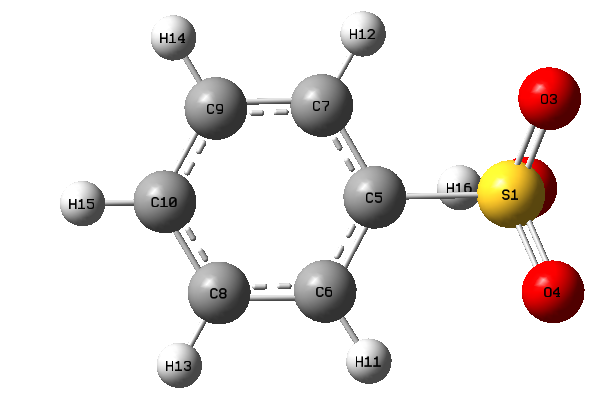 |
| MO6 | C8H11NO | 137.179 |  | 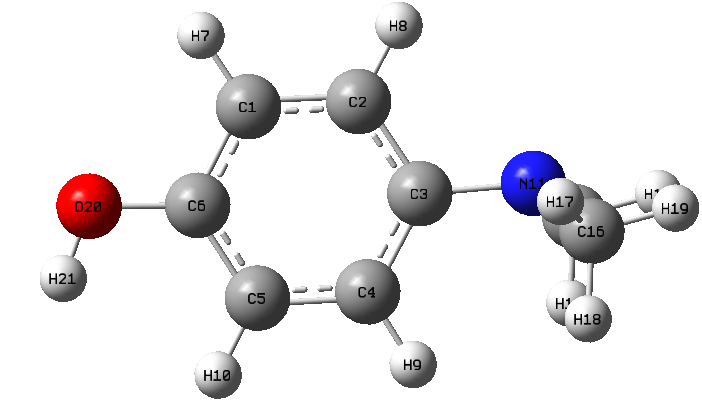 |

MO = Methyl Orange, MO1 = Sulfanilic acid, MO2 = N, N dimethyl benzeneamine, MO3 = Sodium-4-hydroxybenzene sulfonate, MO4 = N, N-dimethyl-p-phenylenediamine, MO5 = Benzenesulfonic acid, MO6 = 4-(dimethylamino) phenol.

**Table S2.** Vibration frequencies of MO degradants

| Degradants | Assignment | Vibrational Frequencies(cm-1) | |
| --- | --- | --- | --- |
| Scaled | Experimental |
| MO | νC-H | 2905 | 3000-2840 |
| νC=C | 1601 | 1650-1600 |
| νC-N | 1347 | 1386-1266 |
| νO-H | 3636 | 3550-3200 |
| νS=O | 1303 | 1350-1342 |
| MO1 | νC=Cb | 713 | 730-665 |
| νN-H | 3478 | 3500 |
| νO-H | 3664 | 3550-3200 |
| νS=O | 1119 | 1165-1150 |
| νC=N | 1610 | 1690-1640 |
| MO2 | νC-H | 2838 | 3000-2840 |
| νC=C | 1587 | 1650-1600 |
| νC-N | 1277 | 1386-1266 |
| MO3 | νC-Ha | 3058 | 3100-3000 |
| νC=C | 1591 | 1650-1600 |
| νO-H | 3691 | 3550-3200 |
| νS=O | 1182 | 1195-1168 |
| MO4 | νC-Hb | 1448 | 1465 |
| νC=C | 1617 | 1650-1600 |
| νN-H | 3436 | 3500 |
| νC-N | 1320 | 1342-1266 |
| MO5 | νC-Ha | 3109 | 3100-3000 |
| νC=C | 1574 | 1650-1600 |
| νO-H | 3660 | 3550-3200 |
| νS=O | 1285 | 1350-1342 |
| MO6 | νC-H | 2957 | 3000-2840 |
| νC-Ha | 3048 | 3100-3000 |
| νC=C | 1598 | 1650-1600 |
| νO-H | 3694 | 3550-3200 |
| νC-N | 1281 | 1386-1266 |

a = aromatic, b=bend

| Degradants | Transition states | Wavelength (nm) | Excitation energy (eV) | Configuration of electronic transitions | Oscillator strength |
| --- | --- | --- | --- | --- | --- |
| MO | S0→S2 | 499.39 | 2.48 | (-0.101) H→L, (0.128) H-1→L | 0.016 |
| MO1 | S0→S2 | 274.14 | 4.52 | (0.237) H-2→L, (-0.102) H-3→L, (0.652) H→L+1 | 0.000 |
| MO2 | S0→S2 | 282.14 | 4.39 | (0.463) H→L, (0.533) H→L+1 | 0.000 |
| MO3 | S0→S2 | 396.87 | 3.12 | (0.697) H-1→L | 0.004 |
| MO4 | S0→S2 | 287.19 | 4.32 | (-0.13632) H-2→ L+2, (0.11171) H-2→L+3, (0.67782) H→L | 0.039 |
| MO5 | S0→S2 | 276.58 | 4.48 | (0.689) H-1→L, (0.10377) H→L | 0.001 |
| MO6 | S0→S2 | 275.87 | 4.76 | (0.701) H→L+2 | 0.000 |

**Table S3.** Electronic transition table of the MO degradant

**Table S4.** The binding affinity and nonbonding interactions of MO degradants with the receptor protein (HSA)

| Degradants | Binding affinity (Kcal/mol)  Autodock | Residue in contact | Interaction Type | Distance(A°) |
| --- | --- | --- | --- | --- |
| MO | -8.0 | ARG209  LYS351  SER202  TRP214  LEU481  LYS199  ALA210  VAL482 | CoHB  CHB  PDHB  PS  A  A  PA  PA | 2.566  2.706  3.145  5.751  4.989  3.947  3.697  5.264 |
| MO1 | -6.4 | ALA158  TYR138  TYR161  LEU135 | CHB  PPS  PPS  CoHB | 2.467  4.296  4.349  2.467 |
| MO2 | -6.2 | LEU135  TYR138  TYR161  ALA158  ILE142 | CHB  PPS  PPS  A  A | 3.625  4.524  4.189  4.455  5.054 |
| MO3 | -6.5 | PHE211  SER202  TRP214  LYS199  LEU481 | CHB  MA  PPS  PA  PA | 2.779  2.406  4.605  5.259  5.434 |
| MO4 | -6.0 | LEU135  TYR138  TYR161  ALA158  ILE142 | CHB  PPS  PPS  A  A | 3.731  4.409  4.265  4.378  5.077 |
| MO5 | -6.4 | LEU139  ALA158  TYR138  TYR161 | CHB  CHB  PPS  PPS | 2.824  2.289  4.795  4.003 |

PPS = Pi-Pi Stacked, A = Alkyl, PA = Pi-Alkyl, CoHB = Conventional Hydrogen Bond, CHB=Carbon Hydrogen Bond, PS=Pi-Sigma, PPTS=Pi-Pi T-Shaped, MA=Metal Acceptor, PDHB = Pi Donor Hydrogen Bond

**Table S5. Ligand interactions**

| MO+8rcp | 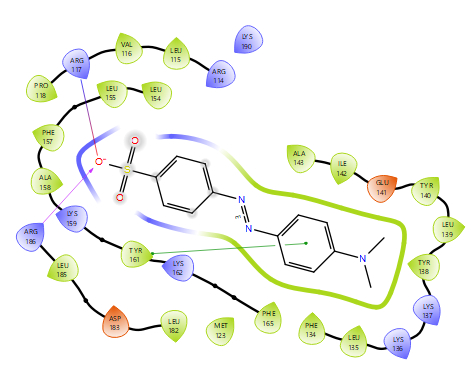 |
| --- | --- |
| MO1+ 8rcp | 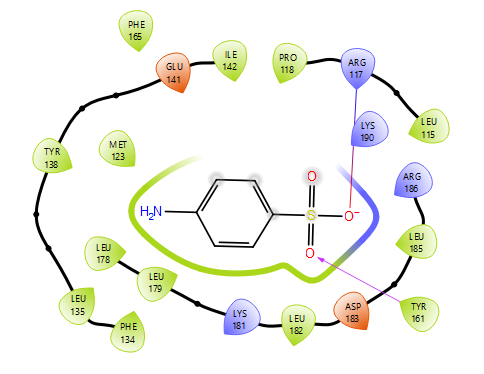 |
| MO2+ 8rcp | 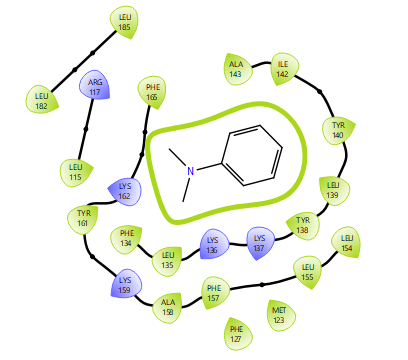 |
| MO3+ 8rcp | 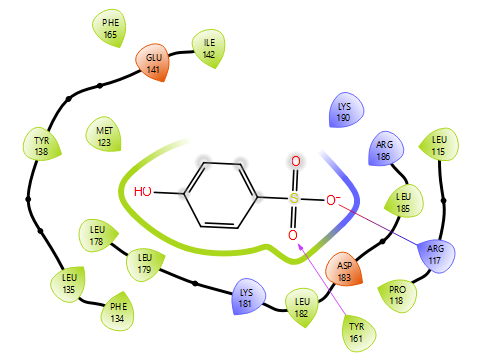 |
| MO4+ 8rcp | 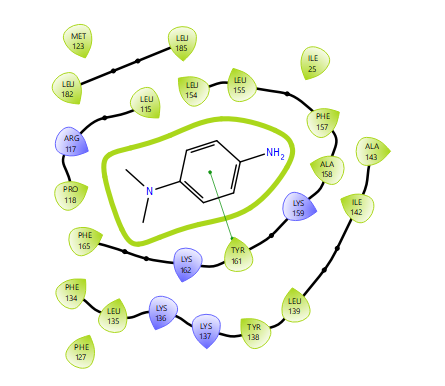 |
| MO5+ 8rcp | 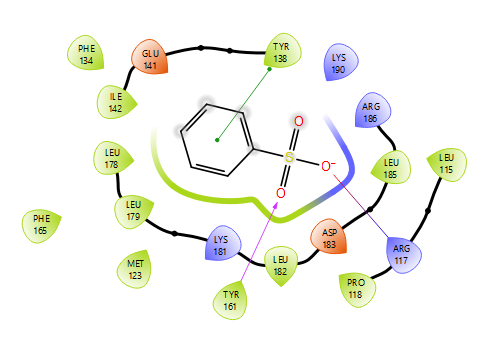 |
| MO6+ 8rcp | 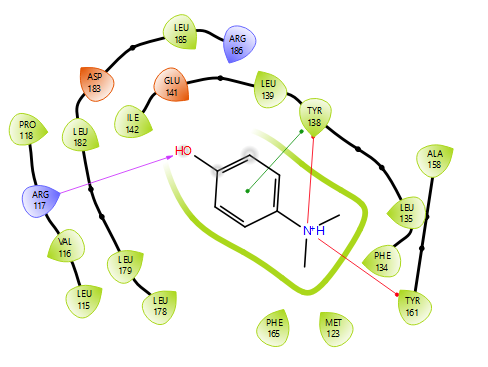 |
